# Supplementary material for: Sound Insulation and Reflection Properties of Sonic Crystal Barrier Based on Micro-Perforated Cylinders
Source: PubMed Central journal article supplement (PMC6747850; doi:10.3390/ma12172806), 2019-08-31
Supplement: materials-12-02806-s001.pdf [file materials-12-02806-s001.pdf]

*Supplementary Materials*

# Sound Insulation and Reflection Properties of Sonic Crystal Barrier Based on Micro-Perforated Cylinders

Stefan M. Dimitrijević <sup>1,2</sup>, Víctor M. García-Chocano <sup>3</sup>, Francisco Cervera <sup>3</sup>, Emelie Roth <sup>1</sup> and José Sánchez-Dehesa <sup>3,\*</sup>

<sup>1</sup> Structor Akustik AB, Solnavägen 4, 113 65 Stockholm, Sweden

<sup>2</sup> School of Electrical Engineering, University of Belgrade, Bulevar K. Aleksandra 73, 11000 Belgrade, Serbia

<sup>3</sup> Department of Electronic Engineering, Universitat Politècnica de València, Camino de Vera s/n, ES-46022 Valencia, Spain

\* Correspondence: jsdehesa@upv.es; Tel.: +34-63-0353-603

Received: 30 June 2019; Accepted: 27 August 2019; Published: date

---

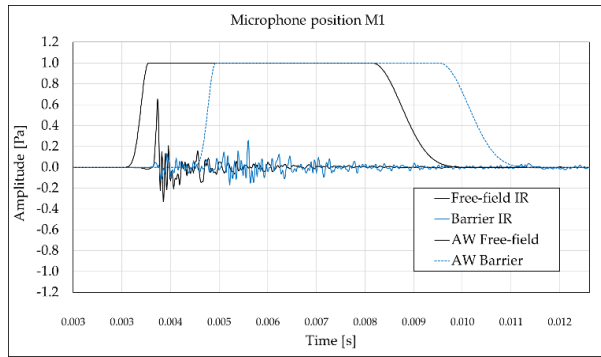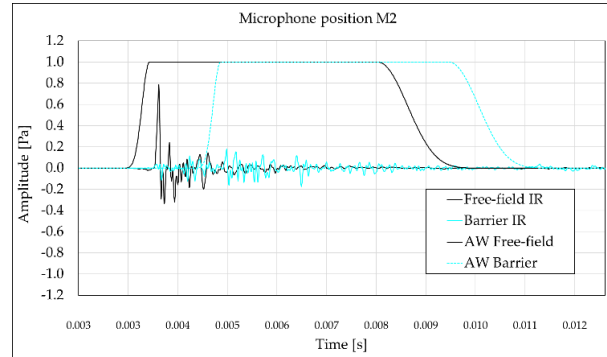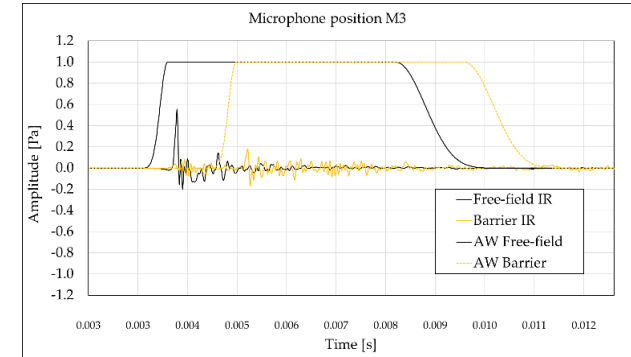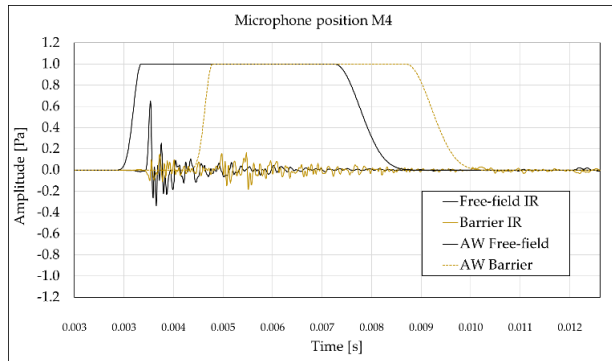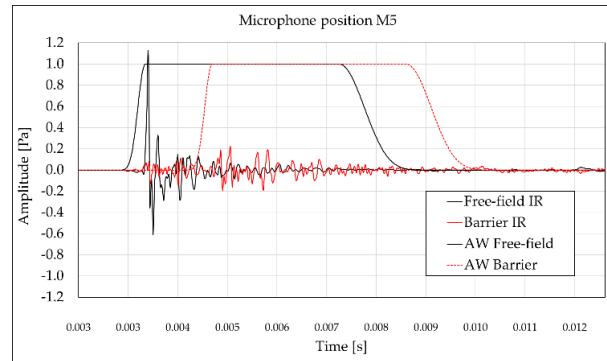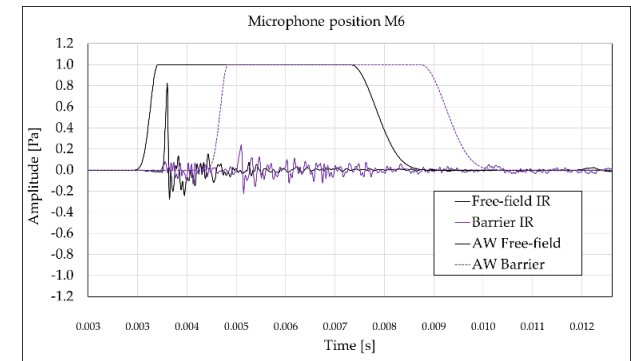

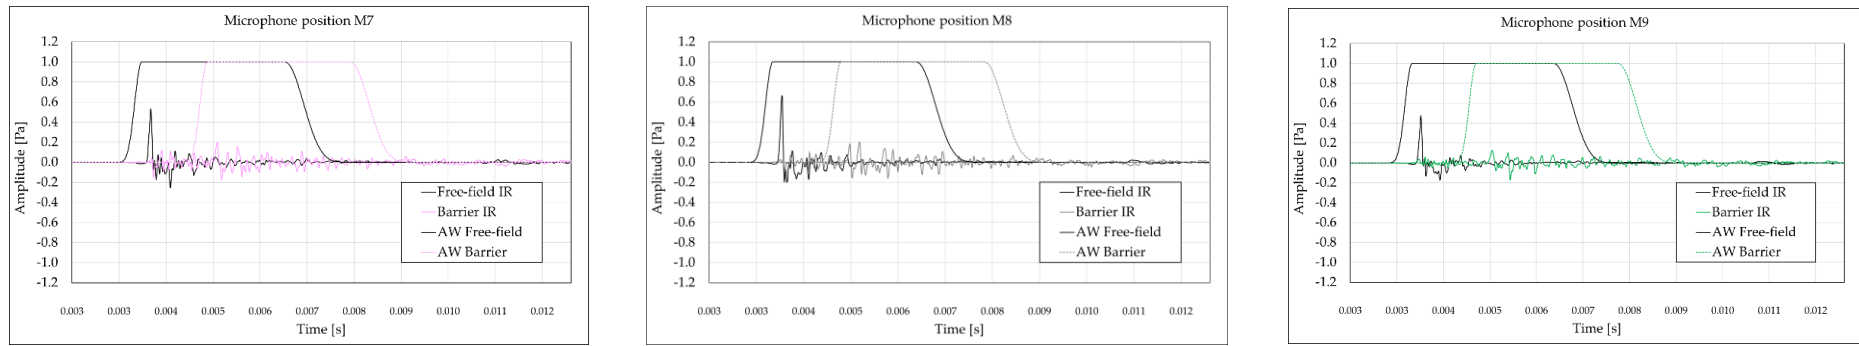

Figure S1. Impulse responses at individual microphone positions M1 – M9 for standardised EN 1793–5 measurement of sound reflection index  $RI$  in configuration A.

0

1

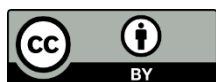

© 2019 by the authors. Submitted for possible open access publication under the terms and conditions of the Creative Commons Attribution (CC BY) license (<http://creativecommons.org/licenses/by/4.0/>).
